# Supplementary material for: Biochar enhanced the nitrogen removal performance of heterotrophic nitrification-aerobic denitrification strain pseudomonas fluorescent sp. Z03 for insufficient carbon source wastewater under low temperature
Source: Research Square preprint supplement (doi:10.21203/rs.3.rs-916848/v1), 2021-10-08
Supplement: Supplementary file 1 [file 3c335abf2eb259a82a264c96.docx]

**Supporting information**

**Biochar enhanced the nitrogen removal performance of heterotrophic nitrification-aerobic denitrification strain *pseudomonas fluorescent* sp. Z03 for insufficient carbon source wastewater under low temperature**

1 Key Laboratory of Nasihu Lake Wetland Ecosystem & Environment Protection, Qufu Normal University, Qufu, Shandong, China

⁎ Corresponding author.

E-mail address: qsd_tmzh@qfnu.edu.cn (M. Tang).


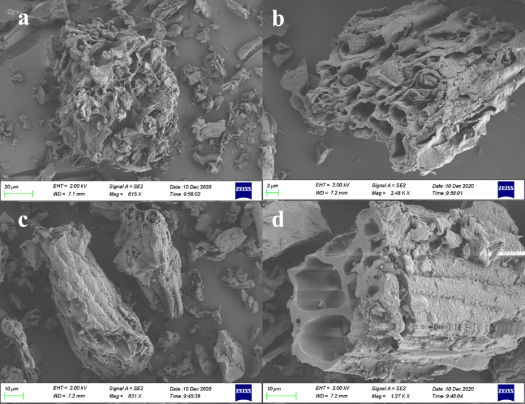
Fig. S1 SEM images of BC400 (a-b) and BC700 (c-d)


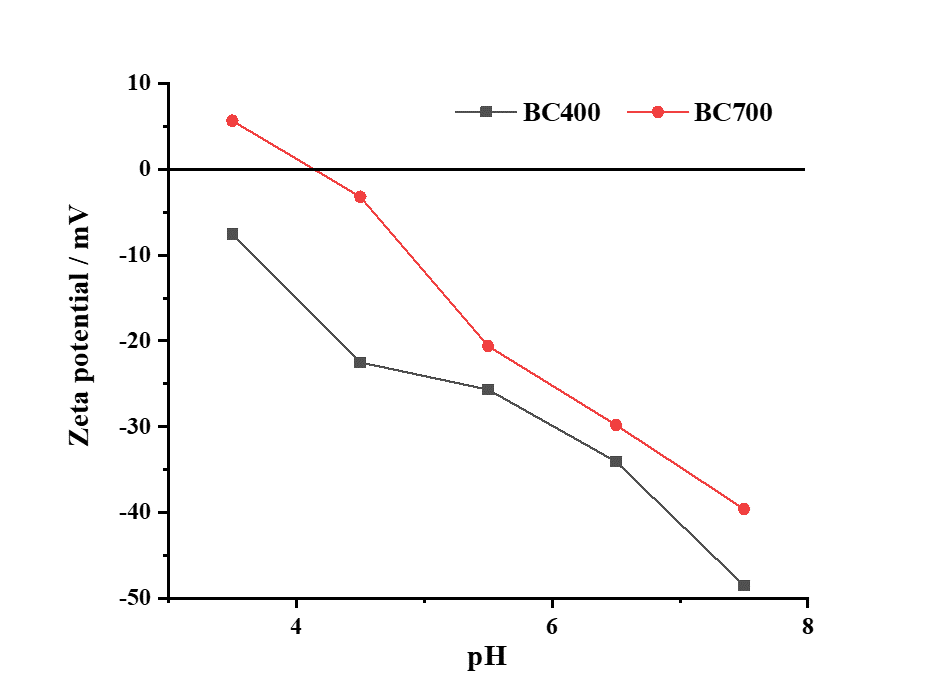
Fig. S2 Zeta potential diagram of BC400 and BC700


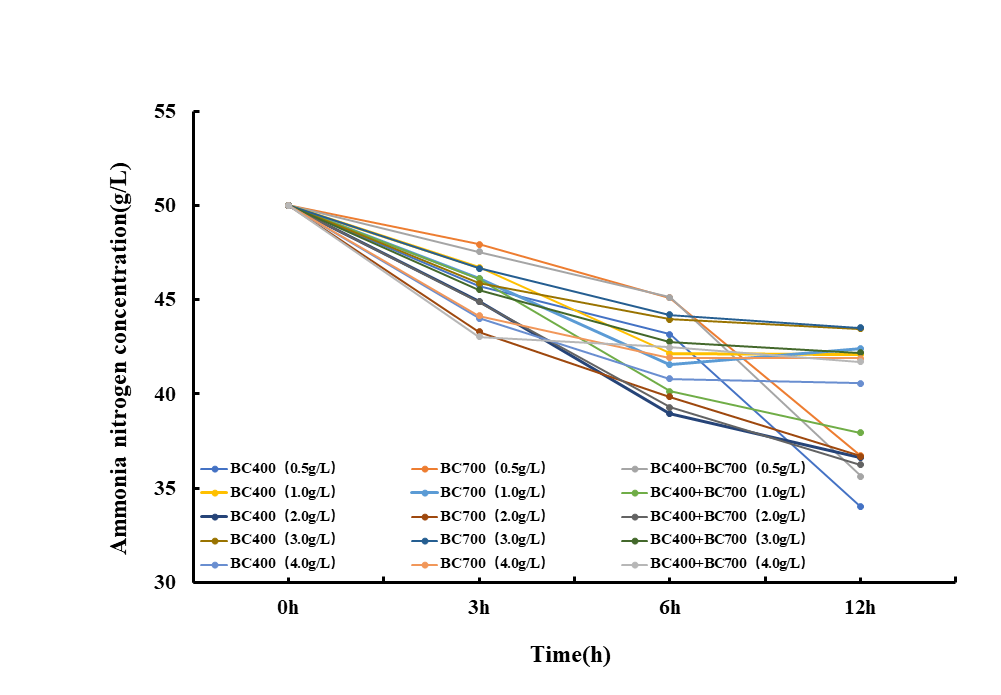
Fig. S3 The adsorption effect of biochar control group on ammonia nitrogen within 12h.
